# Supplementary material for: Lightweight and robust cobalt ferrite/carbon nanotubes/waterborne polyurethane hybrid aerogels for efficient microwave absorption and thermal insulation
Source: Royal Society of Chemistry journal article supplement (doi:10.1039/d1tc02427b), 2021-01-01
Supplement: d1tc02427b1.pdf [file d1tc02427b1.pdf]

## Supplementary Information

### **Lightweight, and Robust Cobalt Ferrite/Carbon Nanotubes/Waterborne Polyurethane Hybrid Aerogels for Efficient Microwave Absorption and Thermal Insulation**

Jiawei Luo<sup>a</sup>, Yu Wang<sup>a</sup>, Zhongji Qu<sup>a</sup>, Wei Wang<sup>a</sup>, Dan Yu<sup>a,\*</sup>

<sup>a</sup>Key Laboratory of Science and Technology of Eco-Textile, Ministry of Education, College of Chemistry, Chemical Engineering and Biotechnology, Donghua University, Shanghai 201620, China

\*Corresponding author: Dan Yu, 2999 north Renmin road, Songjiang district, Shanghai 201620, China. Tel: 86-21-67792456 Fax: 86-21-67792608 E-mail address: yudan@dhu.edu.cn.

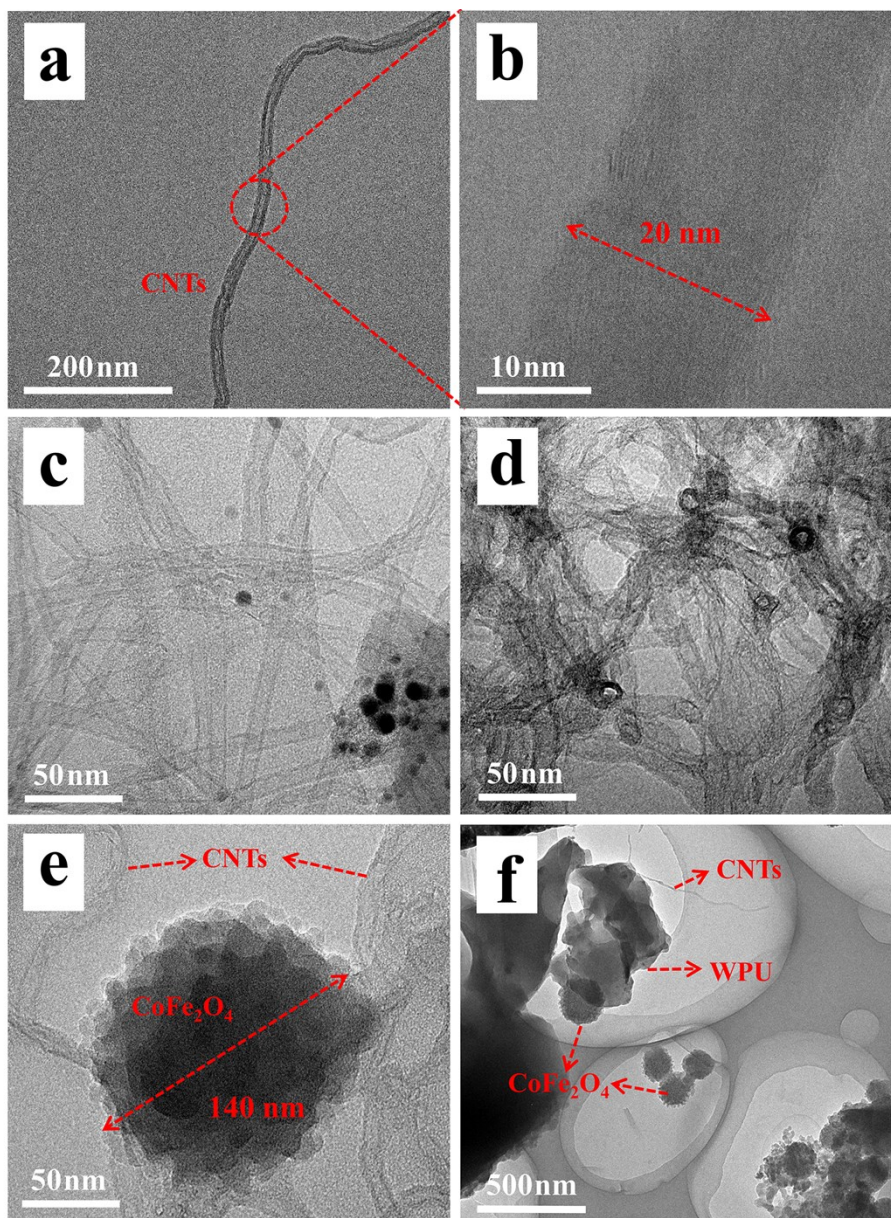

Fig. S1 (a-f) The TEM images of CCW-3 aerogel.

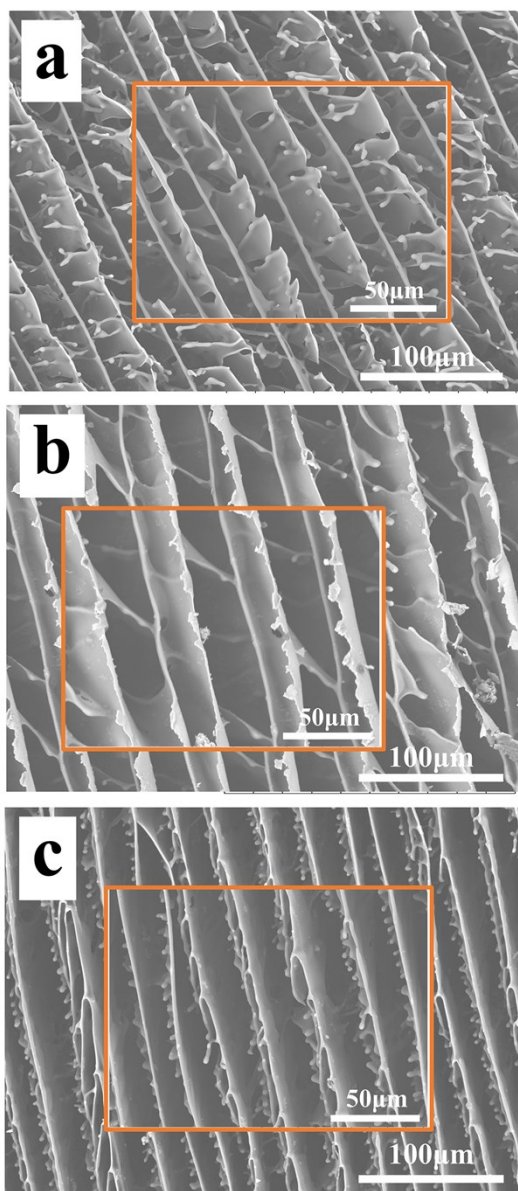

**Fig. S2** (a-c) The enlarged SEM images of lamellar structure for CCW-1, CCW-2, CCW-3 aerogel, respectively.

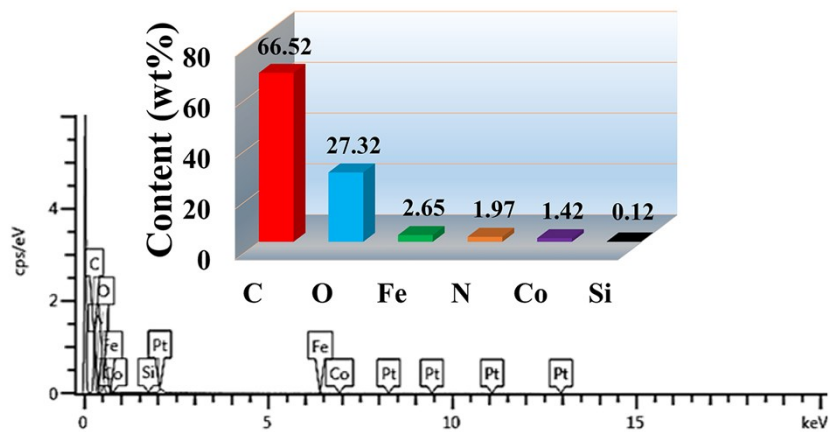

**Fig. S3** The contents of C, O, Fe, N, Co, Si elements in CCW-3 aerogel.

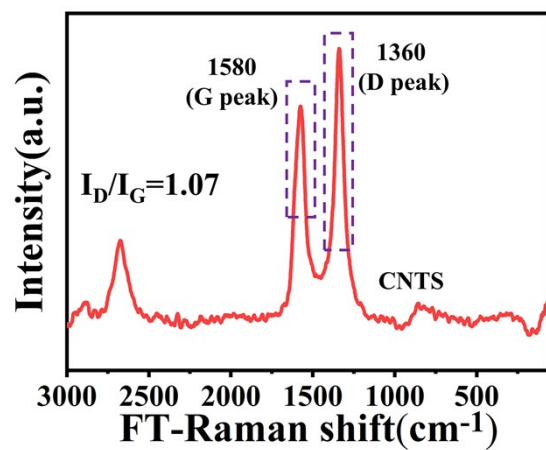

Fig. S4 The Raman spectroscopy of CNTs.

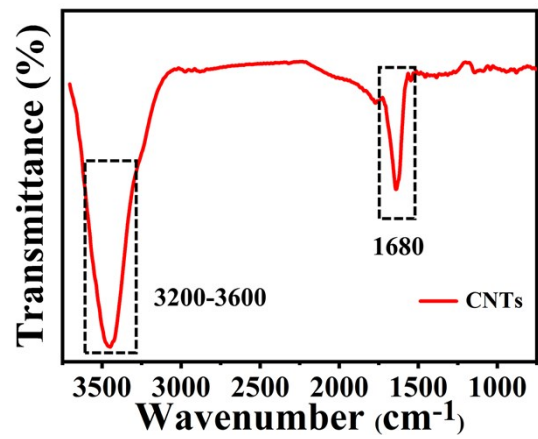

Fig. S5 The infrared spectrum of CNTs

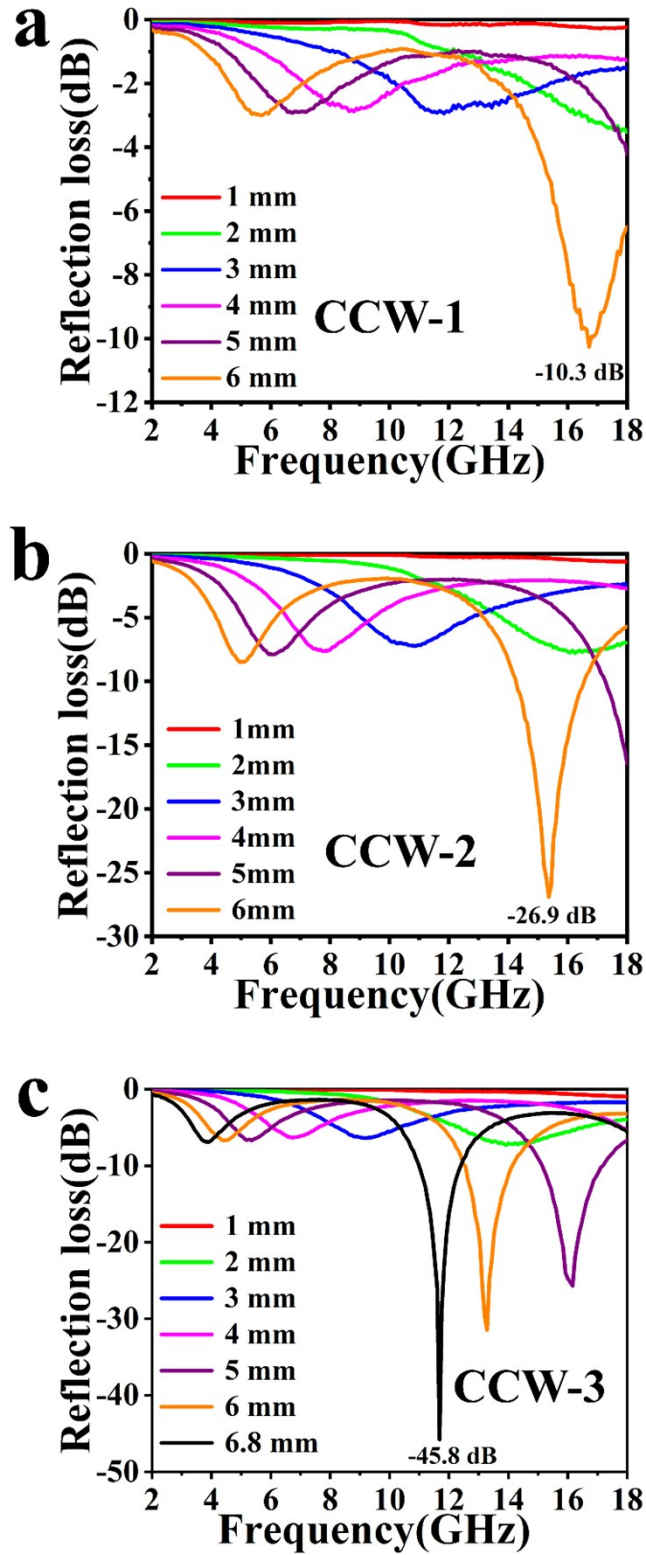

Fig. S6 (a-c) Frequency dependence of reflection loss of CCW-1, CCW-2, CCW-3 aerogel.

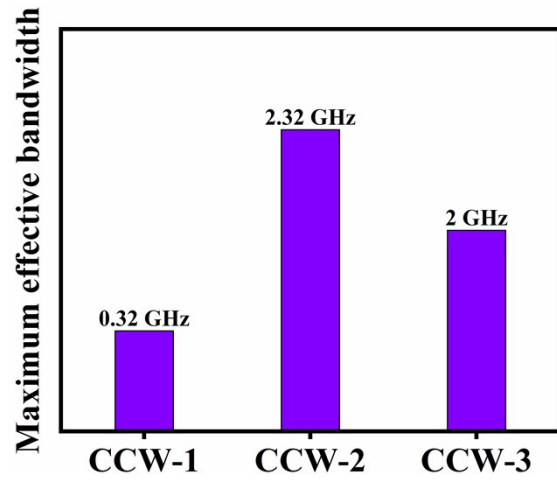

**Fig. S7** The maximum effective bandwidth of CCW-1, CCW-2, CCW-3 aerogel.



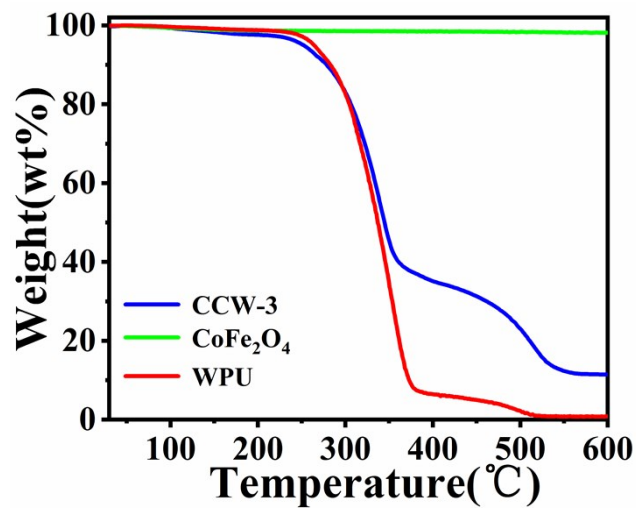

**Fig. S8** The TG profiles of the CCW-3 aerogel, WPU and CoFe<sub>2</sub>O<sub>4</sub> in the air atmosphere.

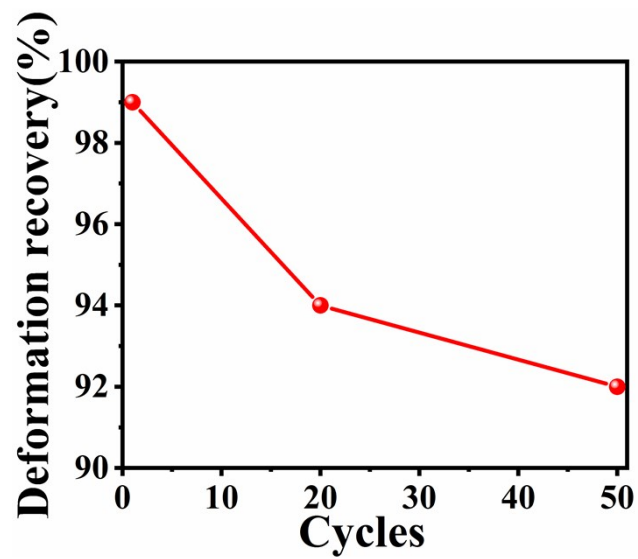

Fig. S9 The deformation recovery of CCW-2 aerogel.

**Table S1** Synthetic parameters of aerogels

| Sample | CNTs<br>(mg) | CoFe <sub>2</sub> O <sub>4</sub><br>(mg) | WPU<br>(g) | Deionized water<br>(mL) | C <sub>18</sub> H <sub>29</sub> NaO <sub>3</sub> S<br>(mg) |
|--------|--------------|------------------------------------------|------------|-------------------------|------------------------------------------------------------|
| WPU    | 0            | 0                                        | 7          | 20                      | 80                                                         |
| CCW-1  | 150          | 300                                      | 7          | 20                      | 80                                                         |
| CCW-2  | 300          | 300                                      | 7          | 20                      | 80                                                         |
| CCW-3  | 450          | 300                                      | 7          | 20                      | 80                                                         |

**Table S2** Microwave absorption and mechanical performance of some relevant works.

| Sample                                               | RL <sub>min</sub><br>(dB) | EAB (GHz) | Max stress (kPa) | strain | Ref       |
|------------------------------------------------------|---------------------------|-----------|------------------|--------|-----------|
| Polypyrrole/Cellulose                                | -12.24                    | 4         | 58.3             | 50%    | 1         |
| MXene/Polyimide                                      | -45.4                     | 5.1       | About 80         | 50%    | 2         |
| Ni-doping CoFe <sub>2</sub> O <sub>4</sub>           | -37.66                    | 2.64      | -                | -      | 3         |
| Fe <sub>3</sub> O <sub>4</sub> /Metallic-<br>CNTs/GO | -49                       | -         | About 22         | 95%    | 4         |
| Co/CMF                                               | -46.2                     | 4.8       | About 100        | 50%    | 5         |
| ANF/rGO/PI                                           | -41                       | 4         | 59.5             | 50%    | 6         |
| MXene                                                | -41.8                     | 6.5       | 75               | 50%    | 7         |
| CNTs/PMMA                                            | -24.8                     | 2.5       | -                | -      | 8         |
| CoFe <sub>2</sub> O <sub>4</sub> /CNTs/WPU           | -45.8                     | 2.32      | 194.1            | 50%    | This work |

EAB: (efficient microwave absorption bandwidth (RL below -10 dB))

## References

- 1 S. Feng, J. C. Deng, L. J. Yu, Y. B. Dong, Y. F. Zhu and Y. Q. Fu, *Cellulose*, 2020, **27**, 10213-10224.
- 2 J. Liu, H. B. Zhang, X. Xie, R. Yang, Z. S. Liu, Y. F. Liu and Z. Z. Yu, *Small*, 2018, **14**, 1802479.
- 3 Z. F. Tong, Q. R. Yao, J. Q. Deng, L. C. Cheng, T. Chuang, J. Wang, G. H. Rao, H.

---

Y. Zhou and Z. M. Wang, *Mater. Sci. Eng. B-Adv. Funct. Solid-State Mater.*, 2021, **268**, 115092.

5 Y. Qin, Y. Zhang, N. Qi, Q. Z. Wang, X. J. Zhang and Y. Li, *ACS Appl. Mater. Interfaces*, 2019, **11**, 10409-10417.

5 H. G. Shi, T. Wang, J. B. Cheng, H. B. Zhao, S. L. Li and Y. Z. Wang, *J. Alloys Compd.*, 2021, **863**, 158090.

6 Y. Zhou, S. J. Wang, D. S. Li and L. Jiang, *Compos. Pt. B-Eng.*, 2021, **213**, 108701.

7 Y. Dai, X. Y. Wu, Z. S. Liu, H. B. Zhang and Z. Z. Yu, *Compos. Pt. B-Eng.*, 2020, **200**, 108263.

8 D. F. Zhou, H. Yuan, Y. L. Xiong, G. Q. Luo and Q. Shen, *Compos. Sci. Technol.*, 2021, **203**, 108614.
